# Supplementary material for: Laser ablation of Dbx1 neurons in the pre-Bötzinger complex stops inspiratory rhythm and impairs output in neonatal mice
Source: eLife journal article supplement (doi:10.7554/elife.03427), 2014-07-15
Supplement: supp [file elife-03427-supp-v1.zip]

Archive with 9 entries (9 files):
- elife_poa_e03427_Figure_1_figure_supplement_1.pdf
- elife_poa_e03427_Supplementary_file_2.docx
- elife_poa_e03427_Figure_1_figure_supplement_3.pdf
- elife_poa_e03427_Figure_8_figure_supplement_1.pdf
- elife_poa_e03427_Figure_2_figure_supplement_1.pdf
- elife_poa_e03427_Figure_2_figure_supplement_2.pdf
- elife_poa_e03427_Supplementary_file_1.docx
- elife_poa_e03427_Figure_1_figure_supplement_2.pdf
- elife_poa_e03427_Figure_6_figure_supplement_1.pdf
