# Supplementary material for: Laser ablation of Dbx1 neurons in the pre-Bötzinger complex stops inspiratory rhythm and impairs output in neonatal mice
Source: eLife journal article supplement (doi:10.7554/elife.03427), 2014-07-15
Supplement: supp [file elife-03427-supp-v1.zip › elife_poa_e03427_Supplementary_file_2.docx]

# SUPPLEMENTARY FILE 2

**Table 3**. Discrete network simulations. As in the main text and the table above, parameters (*n,p*) represent the number of constituent neurons and connection probability. Here the networks are Erdős-Rényi static directed random graphs G(*n,p*) (as in Figures 6 and Figure 6 – supplement 1); that is, the nodes are not populated with dynamical models and the interconnections between nodes are simply static directed links (rather than dynamical synapses). Each network (static graph) below was subjected to 100 random deletions. During the ablation sequence we computed the following global network metrics: K-core, the number of strongly connected components (SCC), and local network metrics: local cluster coefficient, closeness centrality, and betweenness centrality. The initial (first) and final (last) values for the global and local measures are plotted side by side in the appropriate columns below. We also computed the initial in- and out-degree (i.e., the average number of directed connections in and out), percentage drop in the final average in-degree, and the percentage-drop of the final average out-degree. The “Ave.” row reports average change (in percent) for K-core, SCC, cluster coefficient, closeness centrality, and betweenness centrality, as well as the average in- and out-degree for initial and final states of the network. Definitions for the characteristic measures are elaborated in the Materials and methods.

| *n* | *p* | run | K-core  (first, last) | SCC | Local cluster coefficient | Closeness centrality | Betweenness  centrality | Initial degree  (in & out) | Final in-degree (Percentage drop) | Final out-degree (Percentage drop) |
| --- | --- | --- | --- | --- | --- | --- | --- | --- | --- | --- |
| 220 | 0.2 | 1 | 29 20 | 1 1 | 0.16 0.23 | 0.55 0.56 | 0.0028 0.0048 | 44.11 | 34.52 | 33.78 |
|  |  | 2 | 27 21 | 1 1 | 0.25 0.16 | 0.55 0.56 | 0.0030 0.0058 | 44.15 | 35.68 | 33.82 |
|  |  | 3 | 30 28 | 1 1 | 0.15 0.28 | 0.54 0.57 | 0.0026 0.0037 | 44.02 | 41.52 | 41.26 |
|  |  | 4 | 29 25 | 1 1 | 0.17 0.19 | 0.55 0.56 | 0.0032 0.0042 | 43.60 | 40.23 | 39.40 |
|  |  | 5 | 30 21 | 1 1 | 0.28 0.24 | 0.56 0.57 | 0.0032 0.0044 | 43.84 | 35.80 | 35.26 |
|  |  | 6 | 29 26 | 1 1 | 0.26 0.24 | 0.57 0.56 | 0.0042 0.0038 | 43.81 | 41.12 | 40.44 |
|  |  | Ave. | 5.5 (19.0%) | 0 | 0.06 (27.5%) | 0.01 (1.7%) | 0.0014 (44.2%) | 43.92 | 38.15 (13.2%) | 37.33 (15.0%) |
| 230 | 0.1875 | 1 | 25 25 | 1 1 | 0.22 0.17 | 0.53 0.52 | 0.0037 0.0035 | 43.00 | 41.37 | 41.09 |
|  |  | 2 | 28 22 | 1 1 | 0.19 0.17 | 0.56 0.55 | 0.0034 0.0046 | 43.27 | 35.91 | 34.89 |
|  |  | 3 | 29 23 | 1 1 | 0.19 0.18 | 0.56 0.56 | 0.0044 0.0047 | 43.08 | 36.84 | 36.26 |
|  |  | 4 | 28 21 | 1 1 | 0.25 0.17 | 0.57 0.56 | 0.0050 0.0050 | 43.10 | 34.08 | 32.94 |
|  |  | 5 | 28 22 | 1 1 | 0.15 0.26 | 0.55 0.55 | 0.0034 0.0028 | 42.76 | 37.71 | 36.84 |
|  |  | Ave. | 5 (18.1%) | 0 | 0.06 (27.5%) | 0.01 (1.2%) | 0.0005 (12.6%) | 43.04 | 37.18 (13.6%) | 36.40 (15.4%) |
| 240 | 0.175 | 1 | 27 24 | 1 1 | 0.16 0.17 | 0.50 0.50 | 0.0039 0.0049 | 42.03 | 38.87 | 38.50 |
|  |  | 2 | 30 26 | 1 1 | 0.20 0.22 | 0.55 0.57 | 0.0033 0.0049 | 42.10 | 37.25 | 36.38 |
|  |  | 3 | 26 22 | 1 1 | 0.18 0.17 | 0.54 0.55 | 0.0026 0.0041 | 41.57 | 37.54 | 37.10 |
|  |  | 4 | 27 23 | 1 1 | 0.15 0.18 | 0.54 0.55 | 0.0025 0.0040 | 41.83 | 35.74 | 33.91 |
|  |  | 5 | 24 20 | 1 1 | 0.23 0.14 | 0.55 0.54 | 0.0025 0.0032 | 41.70 | 37.32 | 36.65 |
|  |  | 6 | 27 21 | 1 1 | 0.21 0.22 | 0.56 0.554 | 0.0037 0.0042 | 41.99 | 33.86 | 33.38 |
|  |  | Ave. | 4.2 (15.1%) | 0 | 0.03 (14.3%) | 0.01 (1.6%) | 0.0011 (35.7%) | 41.87 | 36.76 (12.2%) | 35.99 (14.0%) |
| 250 | 0.1625 | 1 | 25 22 | 1 1 | 0.17 0.21 | 0.48 0.47 | 0.0046 0.0041 | 40.92 | 35.74 | 34.96 |
|  |  | 2 | 21 20 | 1 1 | 0.15 0.25 | 0.55 0.56 | 0.0039 0.0034 | 40.78 | 39.00 | 38.58 |
|  |  | 3 | 21 20 | 1 1 | 0.22 0.18 | 0.55 0.55 | 0.0034 0.0041 | 39.67 | 38.07 | 37.58 |
|  |  | 4 | 24 24 | 1 1 | 0.15 0.10 | 0.54 0.54 | 0.0025 0.0038 | 40.30 | 39.21 | 38.98 |
|  |  | 5 | 20 20 | 1 1 | 0.22 0.18 | 0.56 0.55 | 0.0046 0.0042 | 40.87 | 37.70 | 36.47 |
|  |  | 6 | 27 25 | 1 1 | 0.18 0.19 | 0.55 0.55 | 0.0034 0.0034 | 40.49 | 36.78 | 36.42 |
|  |  | Ave. | 1.1 (4.8%) | 0 | 0.05 (25.6%) | 0.01 (1.2%) | 0.0006 (16.1%) | 40.50 | 37.75 (6.8%) | 37.16 (8.2%) |
| 260 | 0.1625 | 1 | 28 23 | 1 1 | 0.20 0.14 | 0.55 0.54 | 0.0036 0.0033 | 42.15 | 37.30 | 36.55 |
|  |  | 2 | 29 25 | 1 1 | 0.15 0.12 | 0.54 0.54 | 0.0035 0.0034 | 42.28 | 38.18 | 37.69 |
|  |  | 3 | 24 24 | 1 1 | 0.17 0.14 | 0.53 0.54 | 0.0017 0.0034 | 42.44 | 38.22 | 36.92 |
|  |  | 4 | 30 26 | 1 1 | 0.21 0.20 | 0.54 0.55 | 0.0024 0.0033 | 42.20 | 40.42 | 39.61 |
|  |  | 5 | 26 21 | 1 1 | 0.19 0.14 | 0.55 0.55 | 0.0037 0.0045 | 42.25 | 36.73 | 36.28 |
|  |  | 6 | 29 24 | 1 1 | 0.21 0.18 | 0.56 0.54 | 0.0046 0.0026 | 42.81 | 35.29 | 33.72 |
|  |  | Ave. | 3.8 (13.7%) | 0 | 0.03 (17.9%) | 0.01 (2.0%) | 0.001 (30.8%) | 42.35 | 37.69 (11.0%) | 36.79 (13.1%) |
| 270 | 0.1625 | 1 | 26 22 | 1 1 | 0.09 0.13 | 0.53 0.54 | 0.0021 0.0028 | 44.26 | 40.16 | 38.72 |
|  |  | 2 | 26 25 | 1 1 | 0.16 0.19 | 0.55 0.54 | 0.0032 0.0022 | 43.87 | 37.77 | 37.47 |
|  |  | 3 | 27 24 | 1 1 | 0.21 0.14 | 0.55 0.55 | 0.0025 0.0041 | 43.97 | 41.91 | 41.22 |
|  |  | 4 | 28 21 | 1 1 | 0.18 0.26 | 0.55 0.55 | 0.0032 0.0030 | 44.07 | 35.08 | 34.44 |
|  |  | 5 | 25 21 | 1 1 | 0.22 0.17 | 0.55 0.54 | 0.0027 0.0024 | 44.06 | 37.61 | 44.06 |
|  |  | Ave. | 3.8 (14.4%) | 0 | 0.05 (31.3%) | 0.01 (1.6%) | 0.0008 (29.2%) | 44.05 | 38.51 (12.6%) | 39.18 (11.0%) |
| 280 | 0.15 | 1 | 25 25 | 1 1 | 0.12 0.17 | 0.50 0.50 | 0.0039 0.0031 | 41.88 | 40.15 | 39.76 |
|  |  | 2 | 25 25 | 1 1 | 0.14 0.16 | 0.54 0.55 | 0.0031 0.0036 | 41.98 | 38.98 | 38.58 |
|  |  | 3 | 25 21 | 1 1 | 0.16 0.13 | 0.54 0.54 | 0.0028 0.0037 | 41.74 | 37.30 | 36.39 |
|  |  | 4 | 24 20 | 1 1 | 0.18 0.14 | 0.54 0.54 | 0.0023 0.0036 | 42.06 | 33.14 | 32.06 |
|  |  | 5 | 25 20 | 1 1 | 0.16 0.18 | 0.55 0.55 | 0.0043 0.0043 | 42.00 | 35.13 | 33.64 |
|  |  | Ave. | 2.6 (10.5%) | 0 | 0.03 (20.2%) | 0.00 (0.4%) | 0.0007 (21.3%) | 41.93 | 36.94 (11.9%) | 36.09 (13.9%) |
| 290 | 0.1375 | 1 | 24 22 | 1 1 | 0.19 0.20 | 0.49 0.48 | 0.0043 0.0040 | 39.74 | 36.97 | 36.69 |
|  |  | 2 | 23 21 | 1 1 | 0.16 0.19 | 0.54 0.55 | 0.0026 0.0033 | 39.43 | 36.32 | 36.29 |
|  |  | 3 | 22 20 | 1 1 | 0.07 0.11 | 0.51 0.53 | 0.0019 0.0034 | 39.91 | 35.02 | 34.13 |
|  |  | 4 | 22 17 | 1 1 | 0.11 0.16 | 0.53 0.54 | 0.0025 0.0033 | 39.59 | 34.65 | 33.64 |
|  |  | 5 | 20 20 | 1 1 | 0.14 0.17 | 0.54 0.54 | 0.0032 0.0035 | 39.70 | 37.79 | 37.49 |
|  |  | Ave. | 2.2 (9.9%) | 0 | 0.03 (24.3%) | 0.01 (1.4%) | 0.0007 (24.1%) | 39.67 | 36.15 (8.9%) | 35.65 (10.1%) |
| 300 | 0.1375 | 1 | 26 21 | 1 1 | 0.14 0.12 | 0.46 0.45 | 0.0032 0.0047 | 41.56 | 35.81 | 34.34 |
|  |  | 2 | 22 21 | 1 1 | 0.14 0.17 | 0.55 0.54 | 0.0050 0.0033 | 41.23 | 38.10 | 37.69 |
|  |  | 3 | 23 22 | 1 1 | 0.12 0.17 | 0.54 0.55 | 0.0034 0.0041 | 41.54 | 37.92 | 36.74 |
|  |  | 4 | 23 22 | 1 1 | 0.09 0.12 | 0.54 0.54 | 0.0038 0.0039 | 41.20 | 36.70 | 34.62 |
|  |  | 5 | 27 22 | 1 1 | 0.16 0.10 | 0.54 0.53 | 0.0032 0.0033 | 41.00 | 36.16 | 35.14 |
|  |  | 6 | 26 25 | 1 1 | 0.10 0.14 | 0.53 0.54 | 0.0028 0.0032 | 41.31 | 40.16 | 40.02 |
|  |  | Ave. | 2.3 (9.4%) | 0 | 0.04 (31.4%) | 0.01 (1.7%) | 0.0008 (22.4%) | 41.31 | 37.48 (9.3%) | 36.43 (11.8%) |
| 310 | 0.1375 | 1 | 26 20 | 1 1 | 0.12 0.18 | 0.45 0.44 | 0.0049 0.0067 | 42.82 | 35.11 | 34.45 |
|  |  | 2 | 24 21 | 1 1 | 0.17 0.17 | 0.54 0.54 | 0.0022 0.0029 | 42.34 | 35.76 | 35.93 |
|  |  | 3 | 23 21 | 1 1 | 0.15 0.15 | 0.54 0.55 | 0.0036 0.0044 | 42.75 | 38.77 | 38.33 |
|  |  | 4 | 28 20 | 1 1 | 0.13 0.13 | 0.54 0.54 | 0.0028 0.0043 | 42.62 | 35.96 | 35.15 |
|  |  | 5 | 25 24 | 1 1 | 0.16 0.18 | 0.53 0.54 | 0.0022 0.0032 | 42.46 | 40.06 | 39.16 |
|  |  | 6 | 24 21 | 1 1 | 0.13 0.09 | 0.53 0.52 | 0.0023 0.0025 | 42.30 | 35.40 | 33.98 |
|  |  | Ave. | 3.8 (15.2%) | 0 | 0.02 (15.0%) | 0.01 (1.3%) | 0.001 (33.3%) | 42.55 | 36.84 (13.4%) | 36.17 (15.0%) |
| 320 | 0.1375 | 1 | 26 22 | 1 1 | 0.18 0.13 | 0.44 0.42 | 0.0034 0.0070 | 43.89 | 37.58 | 37.65 |
|  |  | 2 | 30 25 | 1 1 | 0.15 0.12 | 0.54 0.54 | 0.0027 0.0035 | 44.05 | 38.36 | 36.93 |
|  |  | 3 | 29 26 | 1 1 | 0.16 0.14 | 0.55 0.53 | 0.0035 0.0025 | 44.34 | 40.19 | 39.63 |
|  |  | 4 | 28 18 | 1 1 | 0.12 0.21 | 0.53 0.54 | 0.0024 0.0028 | 44.00 | 37.95 | 36.27 |
|  |  | 5 | 27 21 | 1 1 | 0.15 0.10 | 0.54 0.52 | 0.0024 0.0019 | 43.86 | 35.47 | 35.07 |
|  |  | 6 | 31 24 | 1 1 | 0.12 0.08 | 0.53 0.53 | 0.0022 0.0038 | 43.94 | 35.11 | 33.94 |
|  |  | 7 | 27 20 | 1 1 | 0.13 0.13 | 0.53 0.54 | 0.0023 0.0039 | 44.15 | 34.57 | 32.73 |
|  |  | 8 | 26 23 | 1 1 | 0.15 0.10 | 0.54 0.53 | 0.0024 0.0038 | 44.28 | 37.33 | 36.09 |
|  |  | 9 | 22 20 | 1 1 | 0.11 0.18 | 0.53 0.54 | 0.0019 0.0029 | 43.97 | 37.53 | 36.71 |
|  |  | 10 | 30 22 | 1 1 | 0.16 0.15 | 0.54 0.54 | 0.0032 0.0036 | 43.98 | 33.27 | 32.13 |
|  |  | 11 | 27 17 | 1 1 | 0.12 0.16 | 0.53 0.54 | 0.0023 0.0051 | 43.82 | 31.51 | 31.39 |
|  |  | 12 | 26 18 | 1 1 | 0.10 0.14 | 0.52 0.54 | 0.0020 0.0038 | 44.08 | 37.21 | 36.40 |
|  |  | 13 | 27 20 | 1 1 | 0.18 0.26 | 0.55 0.56 | 0.0031 0.0044 | 43.60 | 34.51 | 34.90 |
|  |  | 14 | 31 25 | 1 1 | 0.14 0.19 | 0.54 0.55 | 0.0030 0.0039 | 43.75 | 36.73 | 35.63 |
|  |  | 15 | 27 22 | 1 1 | 0.22 0.16 | 0.55 0.55 | 0.0026 0.0044 | 44.16 | 35.43 | 34.68 |
|  |  | 16 | 25 19 | 1 1 | 0.17 0.14 | 0.55 0.53 | 0.0029 0.0021 | 43.54 | 37.01 | 34.81 |
|  |  | Ave. | 6.1 | 0 | 0.00 (1.7%) | 0.00 (0.1%) | 0.0011 (40.4%) | 43.96 | 36.23 (17.6%) | 35.31 (19.7%) |
| 330 | 0.125 | 1 | 24 20 | 1 1 | 0.12 0.19 | 0.53 0.55 | 0.0022 0.0040 | 41.53 | 35.58 | 34.42 |
|  |  | 2 | 26 24 | 1 1 | 0.16 0.12 | 0.53 0.54 | 0.0021 0.0035 | 41.15 | 37.88 | 37.23 |
|  |  | 3 | 25 21 | 1 1 | 0.14 0.26 | 0.55 0.55 | 0.0042 0.0032 | 41.18 | 34.63 | 33.26 |
|  |  | 4 | 24 22 | 1 1 | 0.12 0.15 | 0.53 0.53 | 0.0021 0.0032 | 41.48 | 37.11 | 35.84 |
|  |  | 5 | 24 23 | 1 1 | 0.19 0.12 | 0.54 0.54 | 0.0025 0.0037 | 40.85 | 38.77 | 38.42 |
|  |  | 6 | 24 23 | 1 1 | 0.13 0.19 | 0.53 0.55 | 0.0025 0.0032 | 41.09 | 38.23 | 37.00 |
|  |  | 7 | 26 22 | 1 1 | 0.07 0.14 | 0.53 0.54 | 0.0028 0.0028 | 40.86 | 37.92 | 37.35 |
|  |  | 8 | 26 22 | 1 1 | 0.12 0.12 | 0.53 0.53 | 0.0022 0.0031 | 41.19 | 36.12 | 33.98 |
|  |  | 9 | 23 20 | 1 1 | 0.13 0.15 | 0.53 0.54 | 0.0026 0.0030 | 41.12 | 37.80 | 37.36 |
|  |  | 10 | 23 20 | 1 1 | 0.07 0.11 | 0.52 0.52 | 0.0021 0.0023 | 41.03 | 37.30 | 36.48 |
|  |  | 11 | 26 19 | 1 1 | 0.11 0.14 | 0.53 0.54 | 0.0029 0.0035 | 41.19 | 35.94 | 34.32 |
|  |  | 12 | 28 22 | 1 1 | 0.12 0.14 | 0.53 0.52 | 0.0020 0.0015 | 41.11 | 34.95 | 34.29 |
|  |  | 13 | 26 23 | 1 1 | 0.14 0.12 | 0.53 0.53 | 0.0024 0.0027 | 41.52 | 37.17 | 36.13 |
|  |  | 14 | 25 20 | 1 1 | 0.11 0.12 | 0.53 0.53 | 0.0029 0.0040 | 40.63 | 32.76 | 31.95 |
|  |  | 15 | 25 20 | 1 1 | 0.11 0.12 | 0.53 0.53 | 0.0032 0.0033 | 41.28 | 34.93 | 34.74 |
|  |  | 16 | 23 17 | 1 1 | 0.18 0.11 | 0.54 0.53 | 0.0022 0.0031 | 41.56 | 35.20 | 34.18 |
|  |  | Ave. | 3.8 | 0 | 0.02 (12.7%) | 0.00 (0.5%) | 0.0006 (22.5%) | 41.17 | 36.39 (11.6%) | 35.43 (13.9%) |
| 340 | 0.125 | 1 | 26 17 | 1 1 | 0.15 0.12 | 0.53 0.54 | 0.0022 0.0037 | 42.28 | 35.23 | 33.83 |
|  |  | 2 | 28 18 | 1 1 | 0.15 0.12 | 0.53 0.54 | 0.0016 0.0038 | 46.74 | 36.20 | 35.16 |
|  |  | 3 | 30 23 | 1 1 | 0.13 0.14 | 0.54 0.53 | 0.0023 0.0033 | 46.68 | 38.55 | 36.49 |
|  |  | 4 | 27 20 | 1 1 | 0.13 0.14 | 0.54 0.52 | 0.0022 0.0017 | 47.15 | 35.31 | 33.84 |
|  |  | 5 | 29 24 | 1 1 | 0.13 0.15 | 0.54 0.53 | 0.0030 0.0017 | 46.36 | 39.45 | 38.61 |
|  |  | 6 | 26 21 | 1 1 | 0.14 0.21 | 0.53 0.54 | 0.0021 0.0027 | 46.65 | 38.55 | 38.14 |
|  |  | 7 | 28 17 | 1 1 | 0.12 0.14 | 0.53 0.54 | 0.0019 0.0044 | 43.00 | 33.15 | 32.26 |
|  |  | 8 | 25 19 | 1 1 | 0.13 0.20 | 0.53 0.54 | 0.0022 0.0031 | 42.67 | 35.52 | 34.70 |
|  |  | 9 | 27 20 | 1 1 | 0.19 0.08 | 0.54 0.51 | 0.0021 0.0024 | 42.52 | 34.27 | 34.35 |
|  |  | 10 | 23 19 | 1 1 | 0.09 0.10 | 0.53 0.53 | 0.0029 0.0024 | 42.62 | 39.05 | 38.15 |
|  |  | 11 | 27 20 | 1 1 | 0.10 0.12 | 0.52 0.54 | 0.0021 0.0035 | 42.75 | 37.93 | 36.75 |
|  |  | 12 | 26 23 | 1 1 | 0.14 0.09 | 0.54 0.53 | 0.0036 0.0025 | 42.39 | 39.14 | 38.68 |
|  |  | 13 | 24 18 | 1 1 | 0.12 0.10 | 0.53 0.52 | 0.0025 0.0026 | 42.61 | 34.91 | 34.07 |
|  |  | 14 | 27 25 | 1 1 | 0.12 0.18 | 0.54 0.54 | 0.0029 0.0032 | 42.36 | 40.27 | 39.90 |
|  |  | 15 | 27 22 | 1 1 | 0.12 0.17 | 0.54 0.53 | 0.0029 0.0026 | 42.70 | 37.98 | 37.62 |
|  |  | 16 | 29 25 | 1 1 | 0.14 0.16 | 0.54 0.54 | 0.0025 0.0023 | 42.59 | 39.38 | 38.62 |
|  |  | Ave. | 6.1 | 0 | 0.01 (5.2%) | 0.00 (0.2%) | 0.0004 (17.7%) | 43.88 | 37.18 (15.3%) | 36.32 (17.2%) |
| 350 | 0.125 | 1 | 27 19 | 1 1 | 0.10 0.14 | 0.54 0.53 | 0.0034 0.0029 | 43.36 | 32.40 | 30.09 |
|  |  | 2 | 27 19 | 1 1 | 0.10 0.13 | 0.54 0.54 | 0.0036 0.0037 | 43.67 | 33.30 | 31.48 |
|  |  | 3 | 29 25 | 1 1 | 0.12 0.12 | 0.53 0.52 | 0.0021 0.0019 | 43.61 | 39.56 | 39.18 |
|  |  | 4 | 29 22 | 1 1 | 0.12 0.14 | 0.53 0.54 | 0.0026 0.0029 | 43.78 | 37.81 | 35.29 |
|  |  | 5 | 28 18 | 1 1 | 0.14 0.12 | 0.54 0.53 | 0.0030 0.0028 | 43.70 | 33.60 | 32.39 |
|  |  | 6 | 25 20 | 1 1 | 0.14 0.12 | 0.54 0.53 | 0.0028 0.0025 | 43.93 | 37.72 | 37.13 |
|  |  | Ave. | 7 (25.5%) | 0 | 0.02 (17.6%) | 0.01 (1.0%) | 0.0003 (10.3%) | 43.67 | 35.73 (18.2%) | 34.26 (21.6%) |
| 360 | 0.1125 | 1 | 24 22 | 1 1 | 0.08 0.12 | 0.52 0.53 | 0.0020 0.0023 | 40.66 | 37.85 | 37.18 |
|  |  | 2 | 26 24 | 1 1 | 0.20 0.10 | 0.53 0.53 | 0.0018 0.0035 | 40.65 | 37.23 | 36.61 |
|  |  | 3 | 22 19 | 1 1 | 0.09 0.12 | 0.53 0.54 | 0.0025 0.0042 | 40.71 | 35.61 | 35.88 |
|  |  | 4 | 24 20 | 1 1 | 0.13 0.12 | 0.54 0.53 | 0.0028 0.0026 | 40.42 | 35.30 | 34.12 |
|  |  | 5 | 24 22 | 1 1 | 0.14 014 | 0.54 0.54 | 0.0029 0.0034 | 40.42 | 37.81 | 37.47 |
|  |  | 6 | 22 21 | 1 1 | 0.13 0.12 | 0.53 0.53 | 0.0024 0.0028 | 40.02 | 38.31 | 37.78 |
|  |  | Ave. | 2.3 (9.7%) | 0 | 0.03 (22.1%) | 0.01 (1.0%) | 0.0008 (33.3%) | 40.48 | 37.02 (8.6%) | 36.51 (9.8%) |
| 370 | 0.1125 | 1 | 25 22 | 1 1 | 0.11 0.11 | 0.53 0.53 | 0.0023 0.0034 | 41.71 | 36.79 | 36.34 |
|  |  | 2 | 27 22 | 1 1 | 0.21 0.09 | 0.54 0.51 | 0.0018 0.0026 | 41.66 | 35.85 | 34.92 |
|  |  | 3 | 26 22 | 1 1 | 0.15 0.10 | 0.53 0.53 | 0.0024 0.0035 | 42.18 | 36.22 | 34.59 |
|  |  | 4 | 25 19 | 1 1 | 0.15 0.13 | 0.54 0.53 | 0.0031 0.0029 | 41.29 | 33.12 | 31.97 |
|  |  | 5 | 25 23 | 1 1 | 0.10 0.10 | 0.53 0.52 | 0.0029 0.0021 | 41.81 | 38.21 | 37.45 |
|  |  | 6 | 23 20 | 1 1 | 0.12 0.11 | 0.53 0.54 | 0.0020 0.0037 | 41.59 | 37.45 | 36.51 |
|  |  | Ave. | 3.8 (15.1%) | 0 | 0.03 (24.5%) | 0.01 (1.6%) | 0.0010 (41.4%) | 41.71 | 36.27 (13.0%) | 35.30 (15.4%) |
| 380 | 0.1125 | 1 | 27 22 | 1 1 | 0.13 0.12 | 0.53 0.53 | 0.0024 0.0030 | 43.24 | 35.50 | 33.78 |
|  |  | 2 | 24 22 | 1 1 | 0.12 0.21 | 0.53 0.53 | 0.0021 0.0020 | 42.32 | 39.94 | 39.12 |
|  |  | 3 | 27 22 | 1 1 | 0.16 0.08 | 0.53 0.52 | 0.0016 0.0024 | 42.65 | 36.10 | 35.21 |
|  |  | 4 | 29 20 | 1 1 | 0.10 0.13 | 0.53 0.54 | 0.0029 0.0034 | 42.35 | 37.35 | 36.87 |
|  |  | 5 | 28 23 | 1 1 | 0.09 0.12 | 0.52 0.53 | 0.0022 0.0024 | 43.01 | 38.99 | 38.15 |
|  |  | 6 | 25 21 | 1 1 | 0.08 0.10 | 0.53 0.53 | 0.0025 0.0031 | 42.61 | 37.51 | 36.69 |
|  |  | Ave. | 5 (18.8%) | 0 | 0.04 (34.8%) | 0.00 (0.8%) | 0.0006 (26.3%) | 42.70 | 37.56 (12.0%) | 36.64 (14.2%) |
| 390 | 0.1125 | 1 | 28 21 | 1 1 | 0.13 0.08 | 0.54 0.52 | 0.0022 0.0028 | 43.66 | 37.34 | 36.88 |
|  |  | 2 | 28 25 | 1 1 | 0.11 0.08 | 0.53 0.52 | 0.0024 0.0022 | 43.67 | 38.09 | 37.87 |
|  |  | 3 | 27 21 | 1 1 | 0.11 0.12 | 0.53 0.53 | 0.0024 0.0024 | 43.96 | 36.81 | 36.74 |
|  |  | 4 | 21 12 | 1 1 | 0.10 0.09 | 0.53 0.52 | 0.0029 0.0027 | 44.02 | 35.85 | 34.79 |
|  |  | 5 | 28 19 | 1 1 | 0.11 0.10 | 0.53 0.53 | 0.0026 0.0034 | 44.07 | 34.72 | 33.76 |
|  |  | Ave. | 6.8 (25.8%) | 0 | 0.02 (19.5%) | 0.01 (2.0%) | 0.0004 (16.0%) | 43.87 | 36.56 (16.7%) | 36.01 (17.9%) |
