# Supplementary figures and images for: Laser ablation of Dbx1 neurons in the pre-Bötzinger complex stops inspiratory rhythm and impairs output in neonatal mice
Source: eLife journal article supplement (doi:10.7554/elife.03427), 2014-07-15

Figure S1

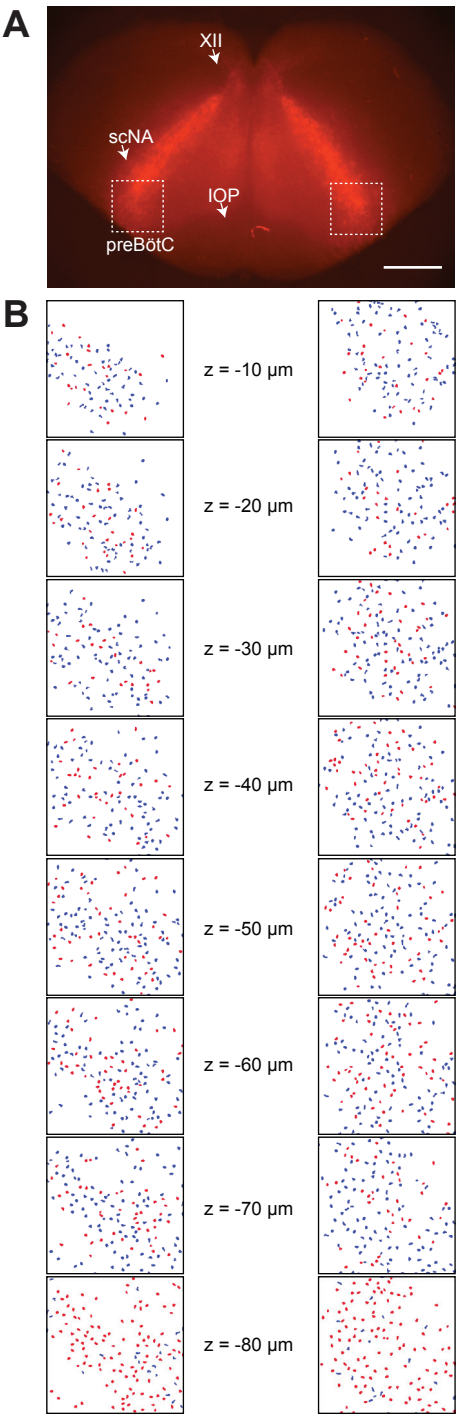

Supplement: supp [file elife-03427-supp-v1.zip › elife_poa_e03427_Figure_1_figure_supplement_1.pdf]

Figure 1 – supplement 3

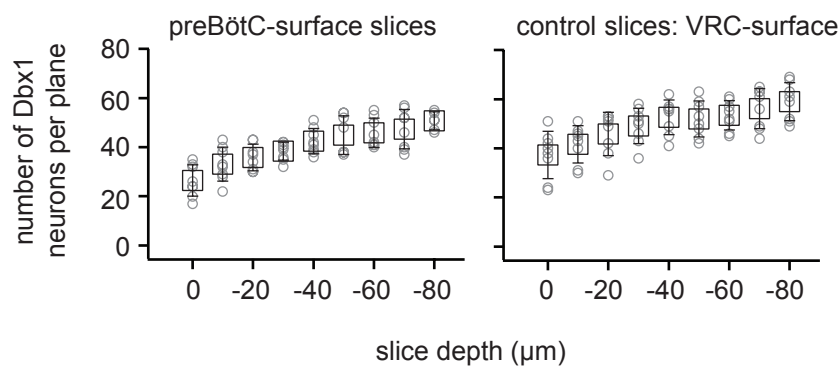

Supplement: supp [file elife-03427-supp-v1.zip › elife_poa_e03427_Figure_1_figure_supplement_3.pdf]

Figure 8 - supplement 1

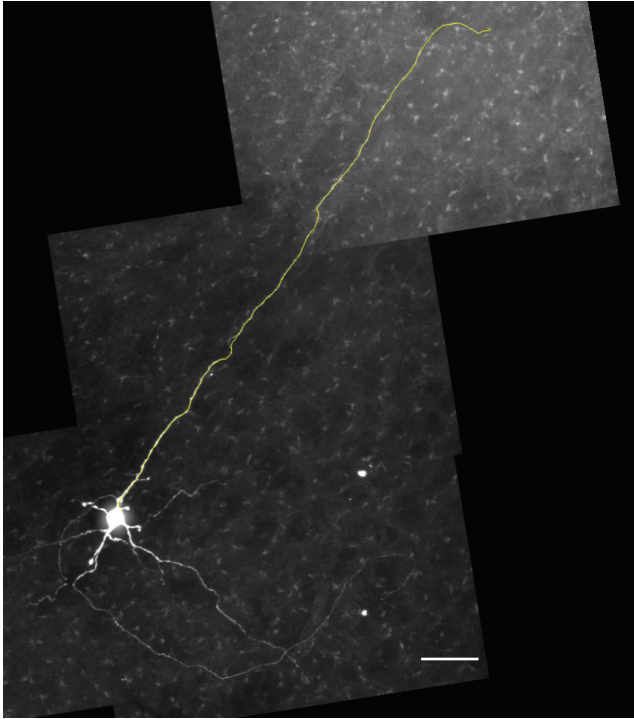

Supplement: supp [file elife-03427-supp-v1.zip › elife_poa_e03427_Figure_8_figure_supplement_1.pdf]

Figure 2 - supplement 1

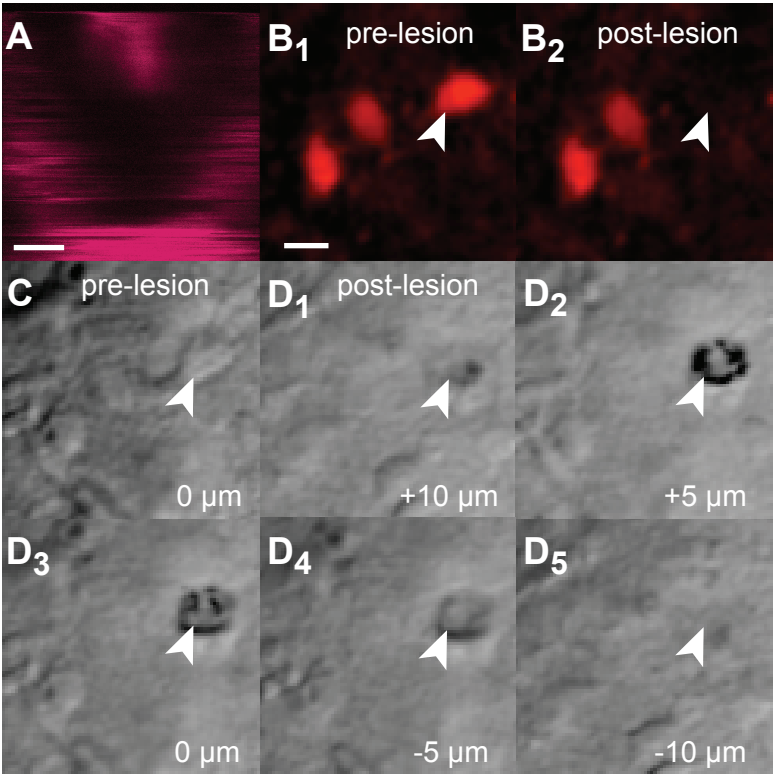

Supplement: supp [file elife-03427-supp-v1.zip › elife_poa_e03427_Figure_2_figure_supplement_1.pdf]

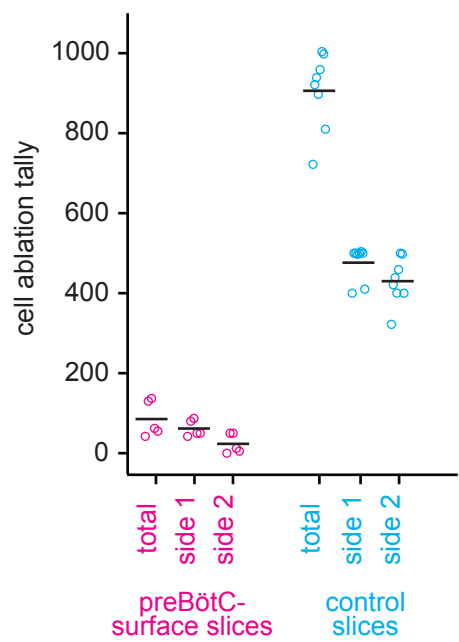

Supplement: supp [file elife-03427-supp-v1.zip › elife_poa_e03427_Figure_2_figure_supplement_2.pdf]

Figure 1 - supplement 2

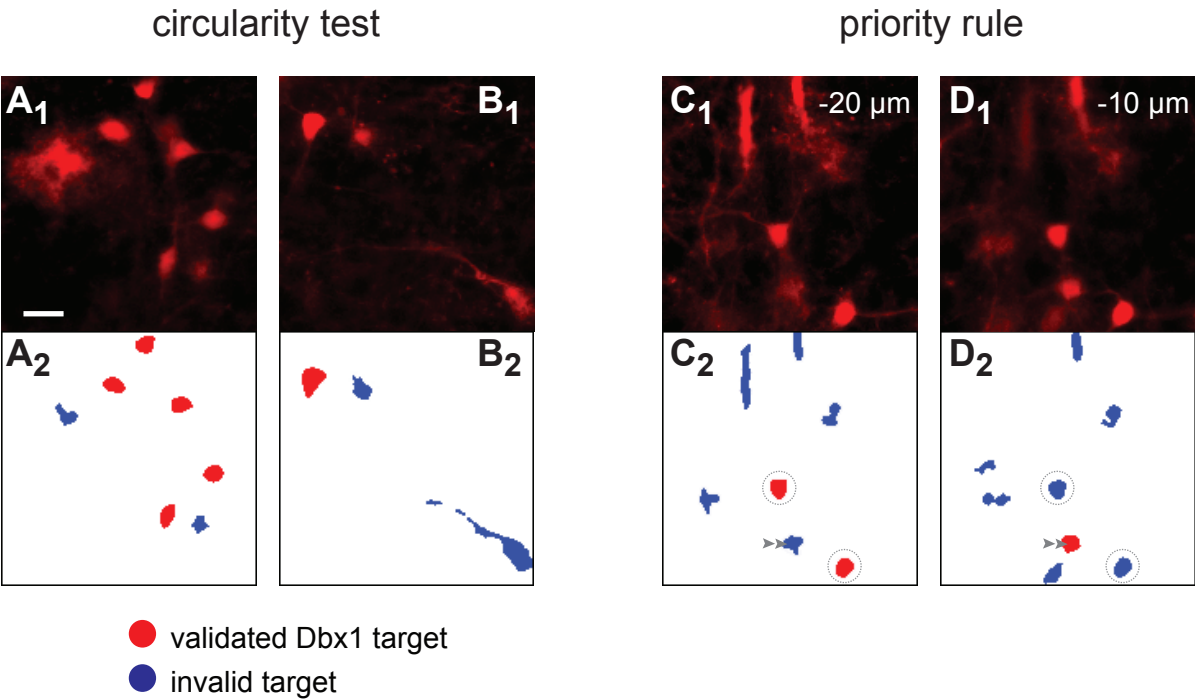

Supplement: supp [file elife-03427-supp-v1.zip › elife_poa_e03427_Figure_1_figure_supplement_2.pdf]

Figure 6 - supplement 1

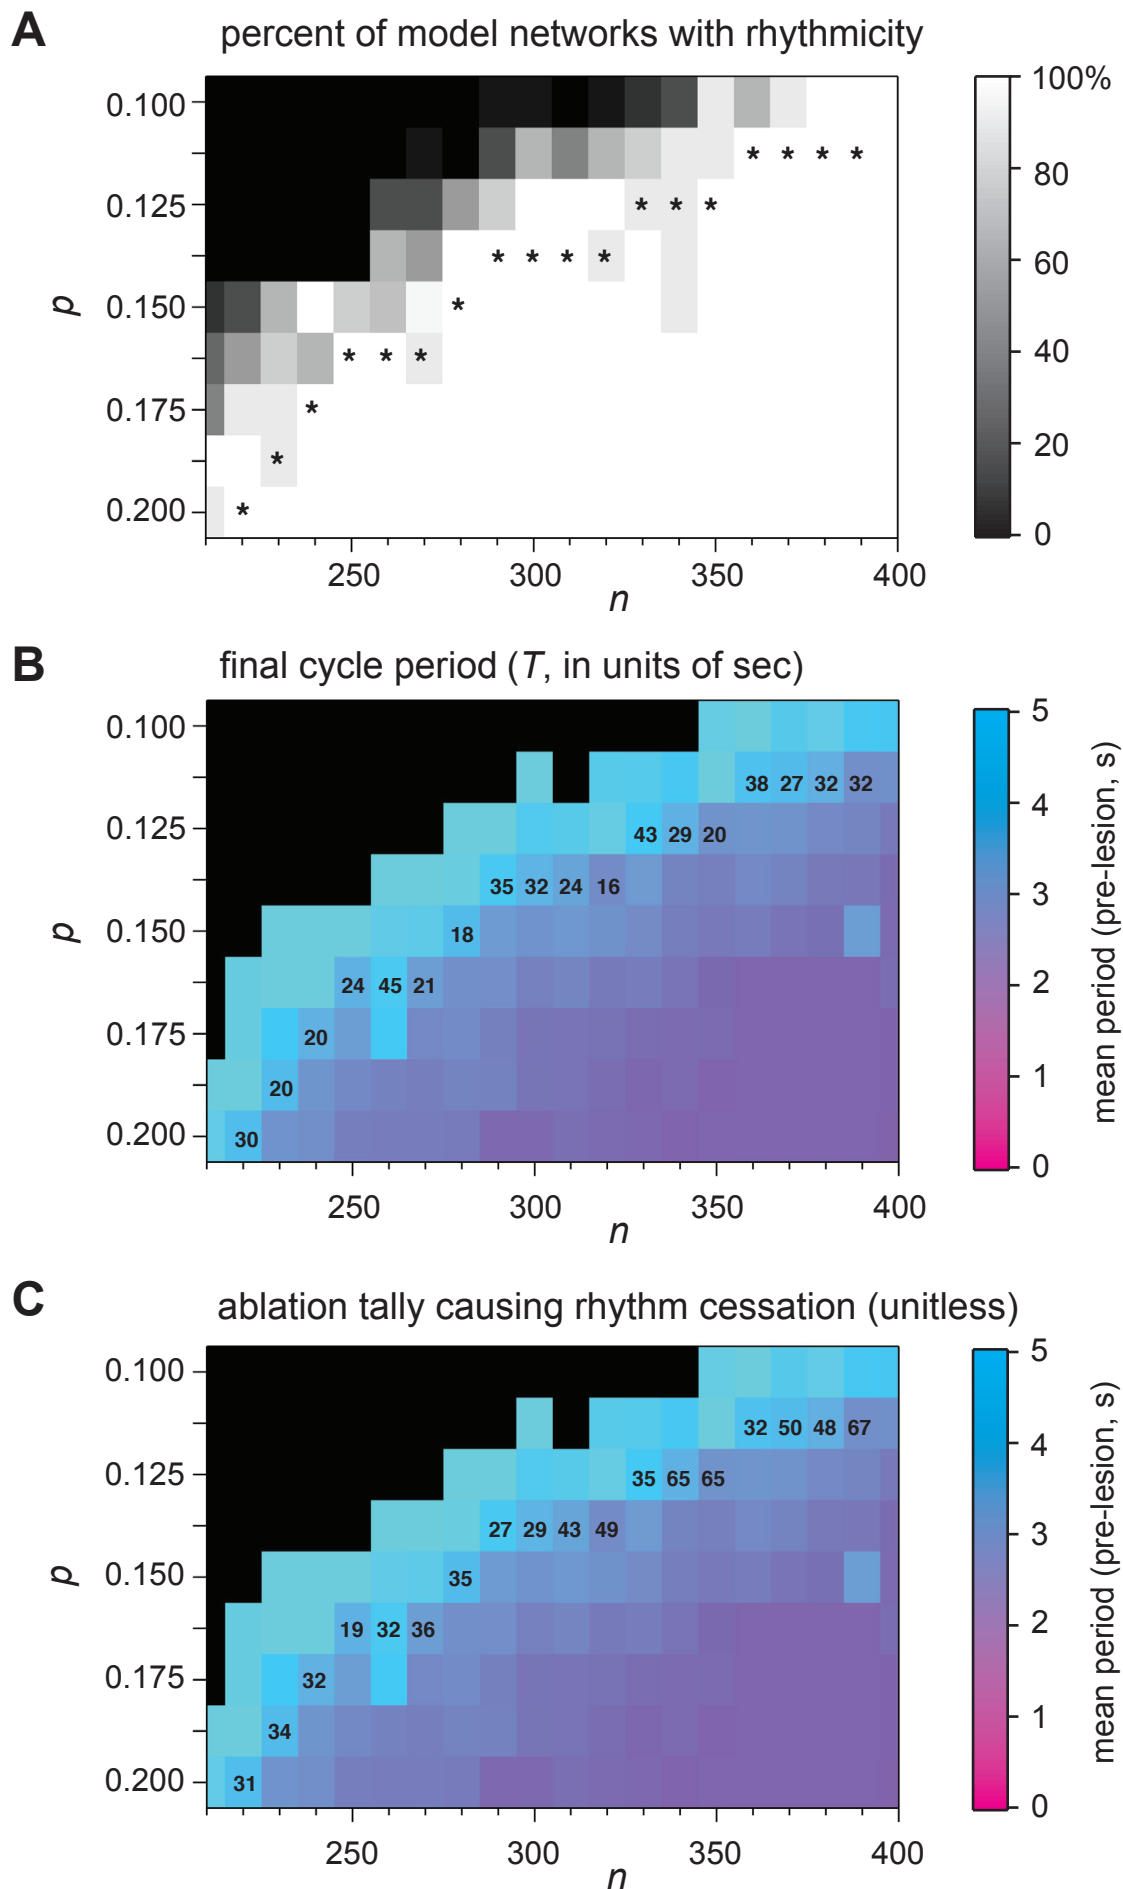

Supplement: supp [file elife-03427-supp-v1.zip › elife_poa_e03427_Figure_6_figure_supplement_1.pdf]
